# Supplementary material
Source: PubMed Central journal article supplement (PMC5539515)
Supplement: NIHMS695486-supplement-Supplementary_Table_1.pdf [file NIHMS695486-supplement-Supplementary_Table_1.pdf]

Supplementary Table 1. Zero-order correlation coefficients between overall (global) pain intensity, pain extent, and pain intensity at each pain site and measures of pain interference and psychological functioning

| Pain intensity and extent measures | Entire sample (N = 182) |                                   | Only those with pain at a specific site |                         |                                   |
|------------------------------------|-------------------------|-----------------------------------|-----------------------------------------|-------------------------|-----------------------------------|
|                                    | Pain Interference (BPI) | Psychological Functioning (MHI-5) | N                                       | Pain Interference (BPI) | Psychological Functioning (MHI-5) |
| Global pain intensity              | .63**                   | -.30**                            |                                         |                         |                                   |
| Pain extent                        | .39**                   | -.19*                             |                                         |                         |                                   |
| Intensity at each pain site        |                         |                                   |                                         |                         |                                   |
| Head                               | .19**                   | -.20**                            | 28                                      | .31                     | -.19                              |
| Neck                               | .26**                   | -.18*                             | 93                                      | .47**                   | -.20                              |
| Shoulder                           | .35**                   | -.25**                            | 110                                     | .48**                   | -.36**                            |
| Upper back                         | .24**                   | -.14                              | 67                                      | .39**                   | -.34**                            |
| Lower back                         | .39**                   | -.14                              | 128                                     | .49**                   | -.16                              |
| Arms                               | .37**                   | -.22**                            | 69                                      | .47**                   | -.35**                            |
| Elbows                             | .20**                   | -.01                              | 29                                      | .39*                    | -.04                              |
| Wrists                             | .27**                   | -.14                              | 46                                      | .61**                   | -.30*                             |
| Hands                              | .40**                   | -.18*                             | 70                                      | .61**                   | -.39**                            |
| Buttocks                           | .28**                   | -.15                              | 34                                      | .62**                   | -.27                              |
| Hips                               | .42**                   | -.15*                             | 85                                      | .57**                   | -.38**                            |
| Chest                              | .13                     | -.06                              | 19                                      | .12                     | -.36                              |
| Abdomen/Pelvis                     | .19*                    | -.09                              | 35                                      | .41*                    | -.18                              |
| Legs                               | .53**                   | -.26**                            | 125                                     | .54**                   | -.28**                            |
| Knees                              | .26**                   | -.21**                            | 86                                      | .48**                   | -.34**                            |
| Ankles                             | .36**                   | -.20**                            | 59                                      | .48**                   | -.37**                            |
| Feet                               | .45**                   | -.20**                            | 67                                      | .48**                   | -.25*                             |
| Other                              | .26**                   | -.18*                             | 19                                      | .37                     | -.21                              |

\*p < .05, \*\*p < .01
